# Supplementary material for: Menadione-Induced Oxidative Stress Re-Shapes the Oxylipin Profile of Aspergillus flavus and Its Lifestyle
Source: MDPI journal article supplement (doi:10.3390/toxins7104315), 2015-10-23
Supplement: s1 [file s1]

# Supplementary Materials

**Table S1.** Primer sequences.

| Gene                           | Primer FOR                 | Primer REV                 |
|--------------------------------|----------------------------|----------------------------|
| <b>Aconitase</b>               | 5'-GCGACAAGGAAGGGTGT-TT-3' | 5'-GGAAAGCAGTCTCCCAGAGT-3' |
| <b>Succinate dehydrogenase</b> | 5'-TTCTTCTGCCACGTGAGAGT 3' | 5'-TCTTTTGACCTGCGCGTATG-3' |
| <b>G-6-p dehydrogenase</b>     | 5'-TTCGGGGATCTTAAGGTCGG-3' | 5'-ACTTCGGGCATCTTCAAGGA-3' |
| <b>Transaldolase</b>           | 5'-TTTCCGGGGATGATCTCGAG-3' | 5'-CAGCACGTACGTCATCCTTG-3' |
| <b>AP-1</b>                    | 5'-GGTTGTTTGAGCCGTTGAGT 3' | 5'-ACGGCCTCAATAACAACGAC-3' |
| <b>AtfB</b>                    | 5'-CACCTGCGCAGCGAAGT-3'    | 5'-CGCATGCCGCAGCAT-3'      |

**Table S2.** Pearson correlations among different parameters [fungal growth, conidiogenesis, AFB<sub>1</sub> synthesis, superoxide dismutase (SOD), catalase (CAT), hydrogen peroxide (H<sub>2</sub>O<sub>2</sub>), superoxide anion (ASO) and peroxynitrite production (ONOO)] expressed under (A) control conditions and (B) treatment with 0.1 mM of menadione by *A. flavus* at different time intervals of observation (0–168 hpa).

| (A)                           |                 |                    |                 |                 |                 |                               |                 |                 |
|-------------------------------|-----------------|--------------------|-----------------|-----------------|-----------------|-------------------------------|-----------------|-----------------|
| Variables <sup>1</sup>        | Growth          | Conidiogenesis     | AFB1            | CAT             | SOD             | H <sub>2</sub> O <sub>2</sub> | ASO             | ONOO            |
| Time                          | <b>0.609654</b> | <b>0.908782117</b> | <b>0.768303</b> | −0.37456        | 0.465938        | −0.36338                      | <b>−0.82038</b> | <b>0.692778</b> |
| growth                        | -               | 0.253747248        | <b>0.911778</b> | 0.26252         | 0.231837        | 0.407772                      | <b>−0.84</b>    | <b>0.947715</b> |
| Conidiogenesis                | -               | -                  | 0.439646        | <b>−0.66234</b> | 0.555358        | <b>−0.69881</b>               | <b>−0.6073</b>  | 0.37122         |
| AFB1                          | -               | -                  | -               | 0.247248        | 0.093194        | 0.263343                      | <b>−0.7989</b>  | <b>0.902429</b> |
| CAT                           | -               | -                  | -               | -               | <b>−0.77547</b> | <b>0.83112</b>                | 0.238899        | 0.107151        |
| SOD                           | -               | -                  | -               | -               | -               | −0.55248                      | <b>−0.64755</b> | 0.363224        |
| H <sub>2</sub> O <sub>2</sub> | -               | -                  | -               | -               | -               | -                             | 0.064574        | 0.244587        |
| ASO                           | -               | -                  | -               | -               | -               | -                             | -               | <b>−0.90378</b> |
| (B)                           |                 |                    |                 |                 |                 |                               |                 |                 |
| Variables <sup>1</sup>        | Growth          | Conidiogenesis     | AFB1            | CAT             | SOD             | H <sub>2</sub> O <sub>2</sub> | ASO             | ONOO            |
| Time                          | <b>0.924199</b> | 0.571149662        | <b>0.959767</b> | <b>−0.94673</b> | <b>0.937318</b> | <b>−0.84207</b>               | <b>−0.81551</b> | <b>0.948643</b> |
| growth                        | -               | 0.574247711        | <b>0.946545</b> | <b>−0.83795</b> | <b>0.797845</b> | <b>−0.65452</b>               | <b>−0.89407</b> | <b>0.940706</b> |
| Conidiogenesis                | -               | -                  | 0.553489        | −0.54048        | <b>0.639314</b> | <b>−0.62097</b>               | −0.4491         | <b>0.680415</b> |
| AFB1                          | -               | -                  | -               | <b>−0.84291</b> | <b>0.890135</b> | <b>−0.75651</b>               | <b>−0.93845</b> | <b>0.91803</b>  |
| CAT                           | -               | -                  | -               | -               | <b>−0.85763</b> | <b>0.792345</b>               | <b>0.631716</b> | <b>−0.90906</b> |
| SOD                           | -               | -                  | -               | -               | -               | <b>−0.94395</b>               | <b>−0.71512</b> | <b>0.891644</b> |
| H <sub>2</sub> O <sub>2</sub> | -               | -                  | -               | -               | -               | -                             | 0.552172        | <b>−0.76677</b> |
| ASO                           | -               | -                  | -               | -               | -               | -                             | -               | <b>−0.77261</b> |

<sup>1</sup> Statistic significance: bold values are different from 0 at the significance level of  $\alpha = 0.05$ .
